# Supplementary material for: Bedaquiline, an FDA-approved antibiotic, inhibits mitochondrial function and potently blocks the proliferative expansion of stem-like cancer cells (CSCs)
Source: PubMed Central journal article supplement (PMC5032685; doi:10.18632/aging.100983), 2016-06-22
Supplement: aging-08-1593-s001.pdf [file aging-08-1593-s001.pdf]

**SUPPLEMENTARY MATERIAL**

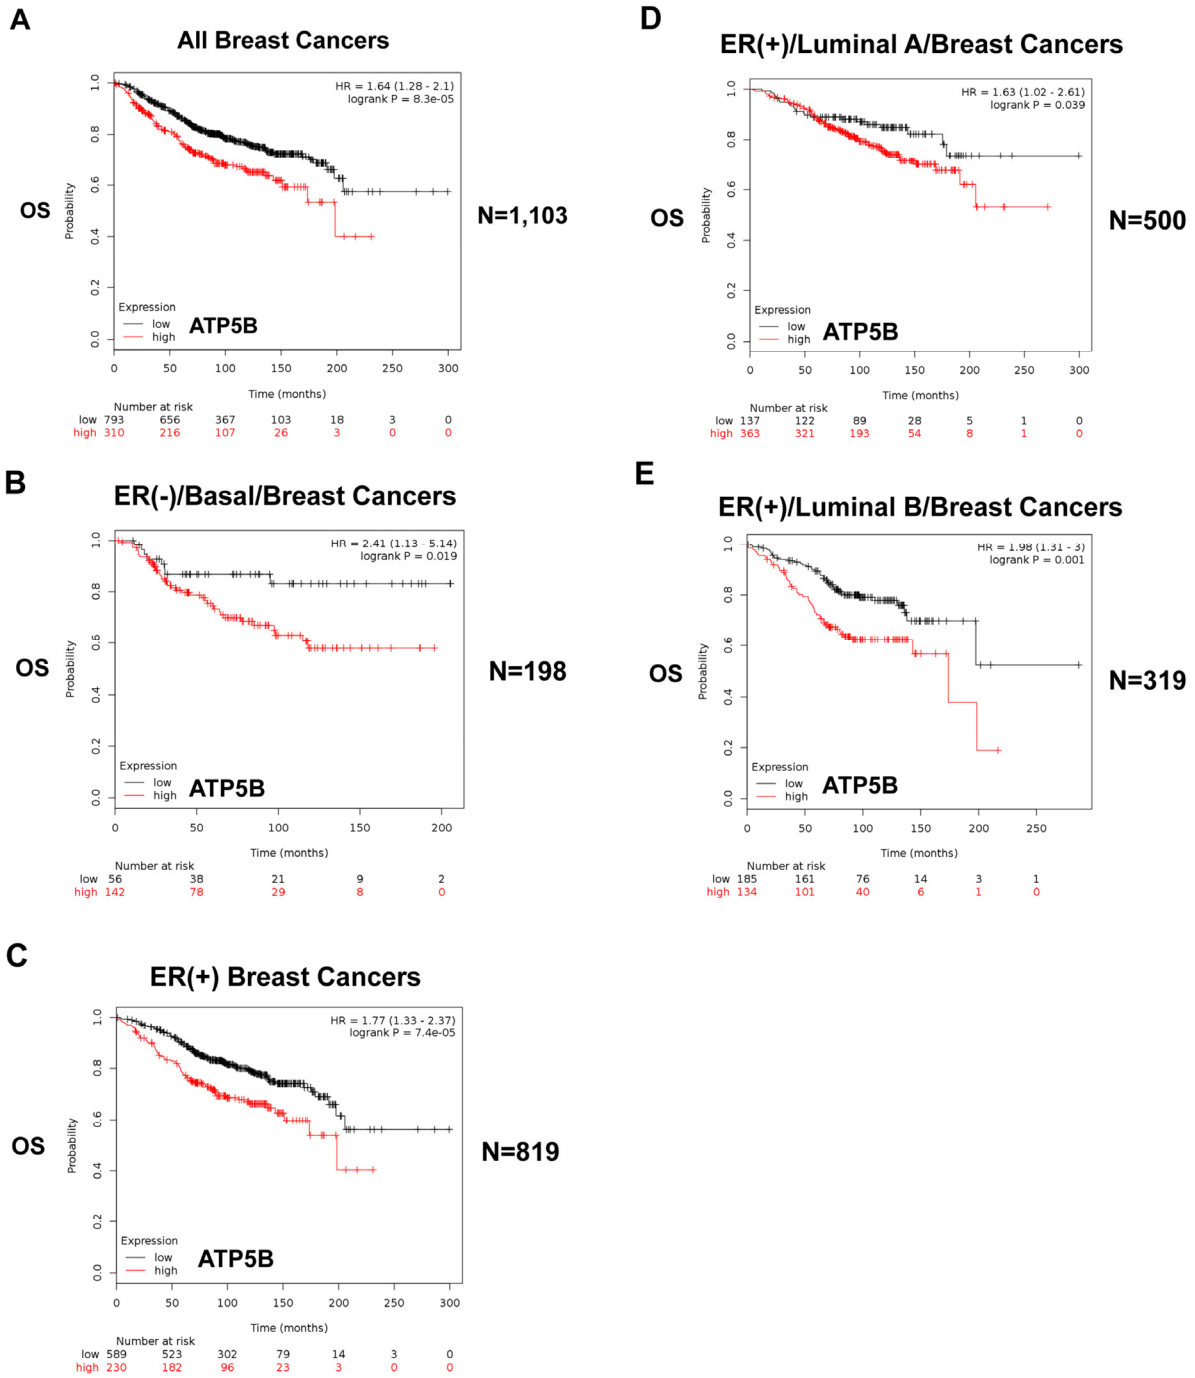

**Supplementary Figure S1.** K-M plots of OS (Overall Survival) are shown for ATP5B expression in different sub-groups of breast cancer patients (Panels A-E).
